# Supplementary material
Source: bioRxiv or medRxiv preprint supplement (https://www.biorxiv.org/highwire/filestream/73188/field_highwire_adjunct_files/8/091512-7.pdf)

**Figure S7A**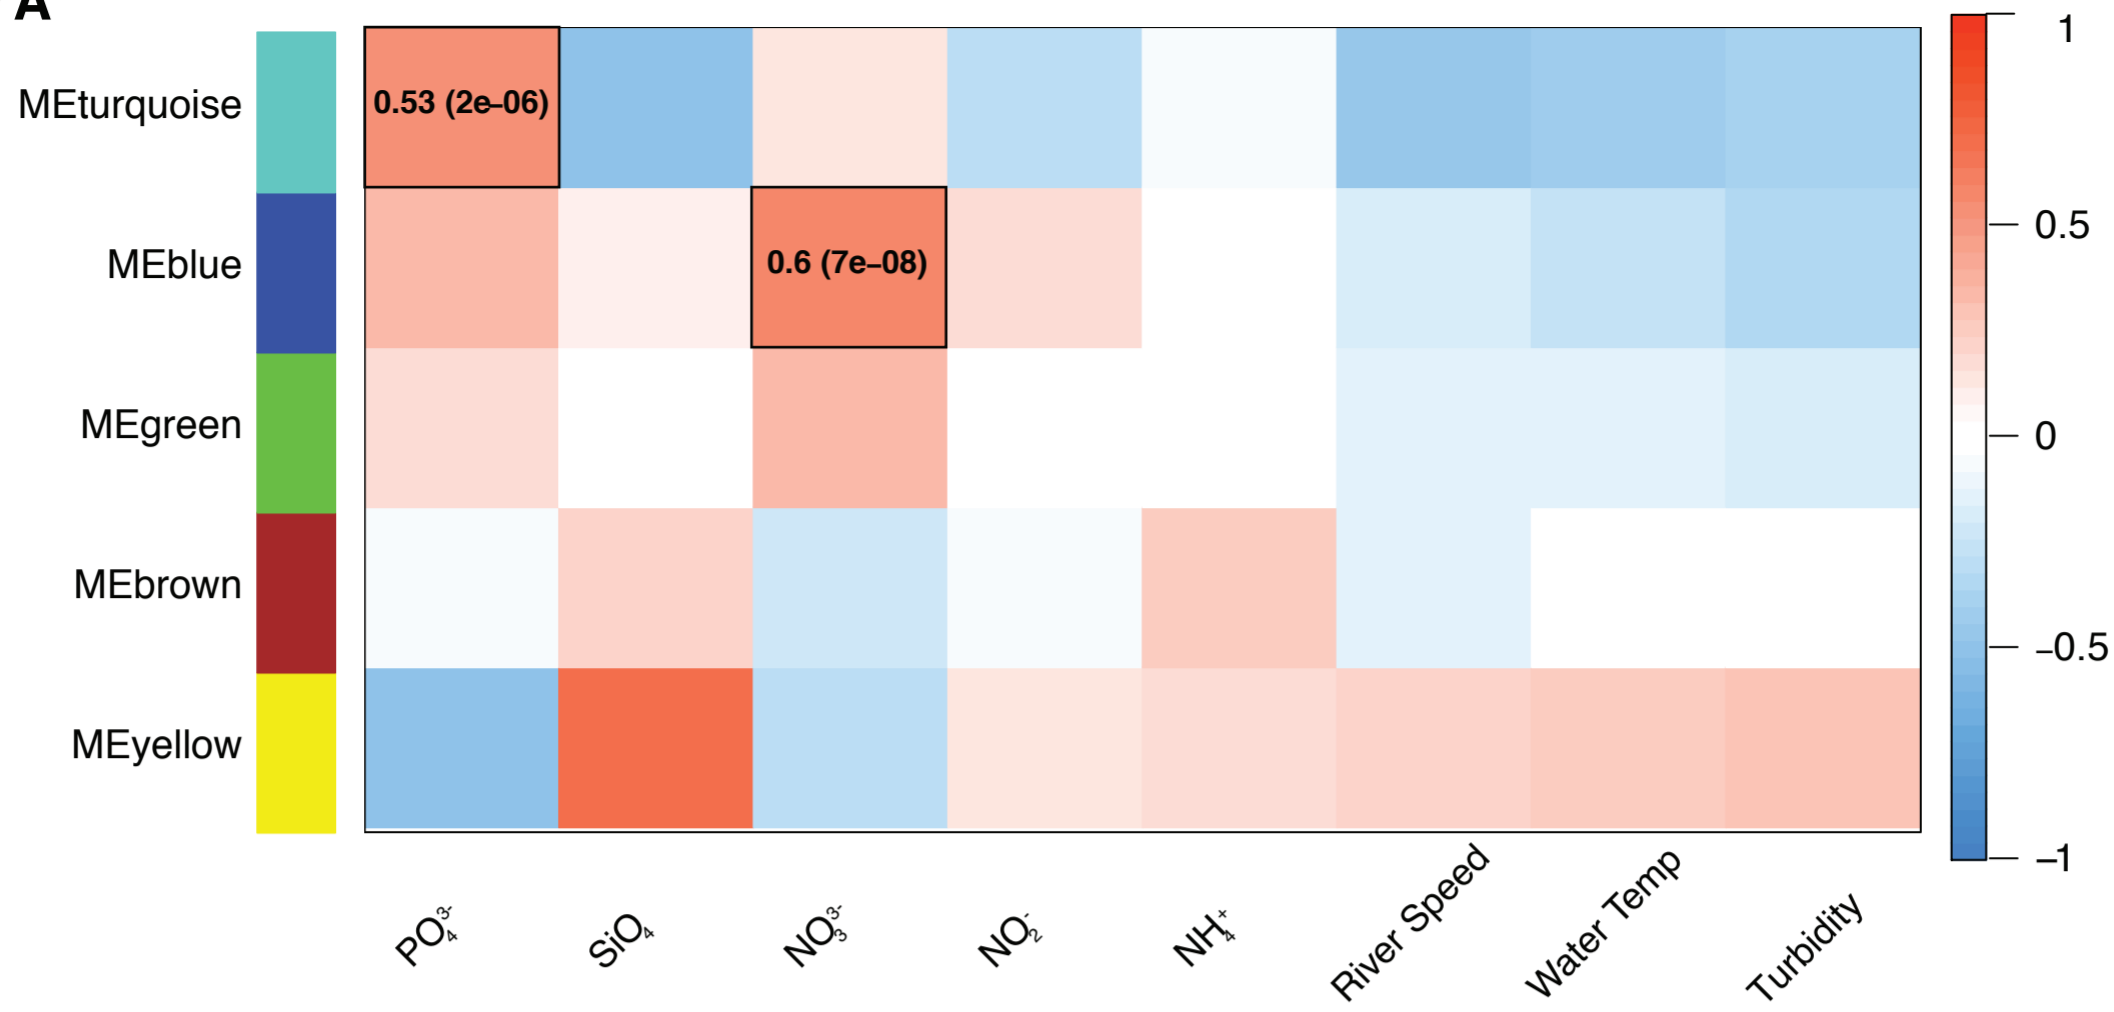**B** Module membership vs. population significance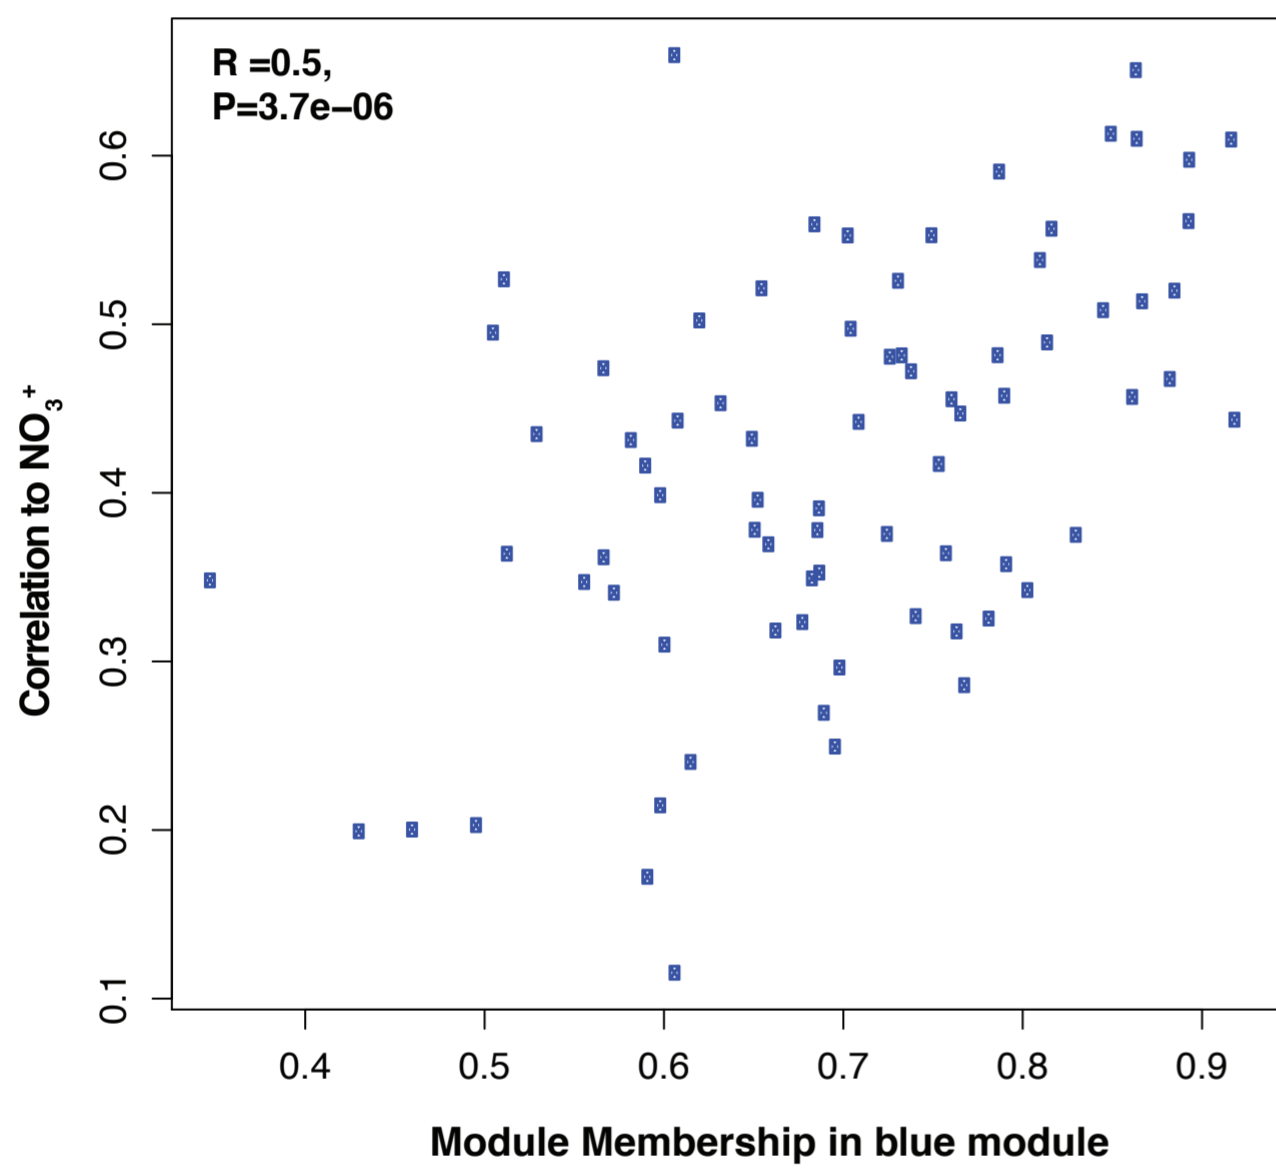**D** Module membership vs. population significance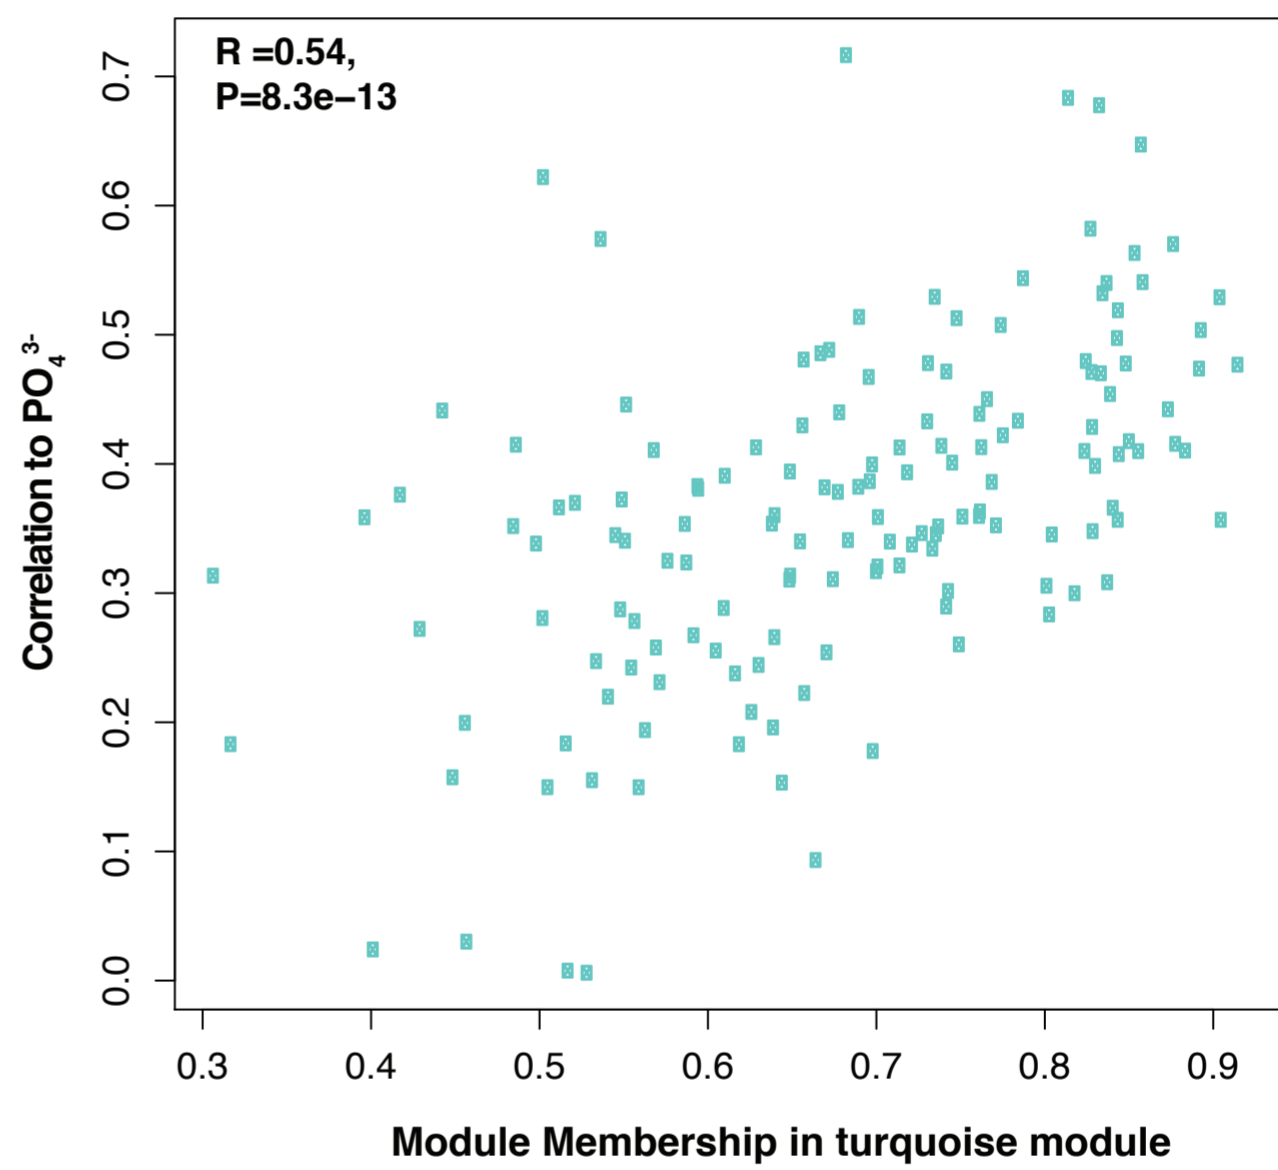**C** Comparison of NO<sub>3</sub><sup>+</sup> measured vs predicted for module blue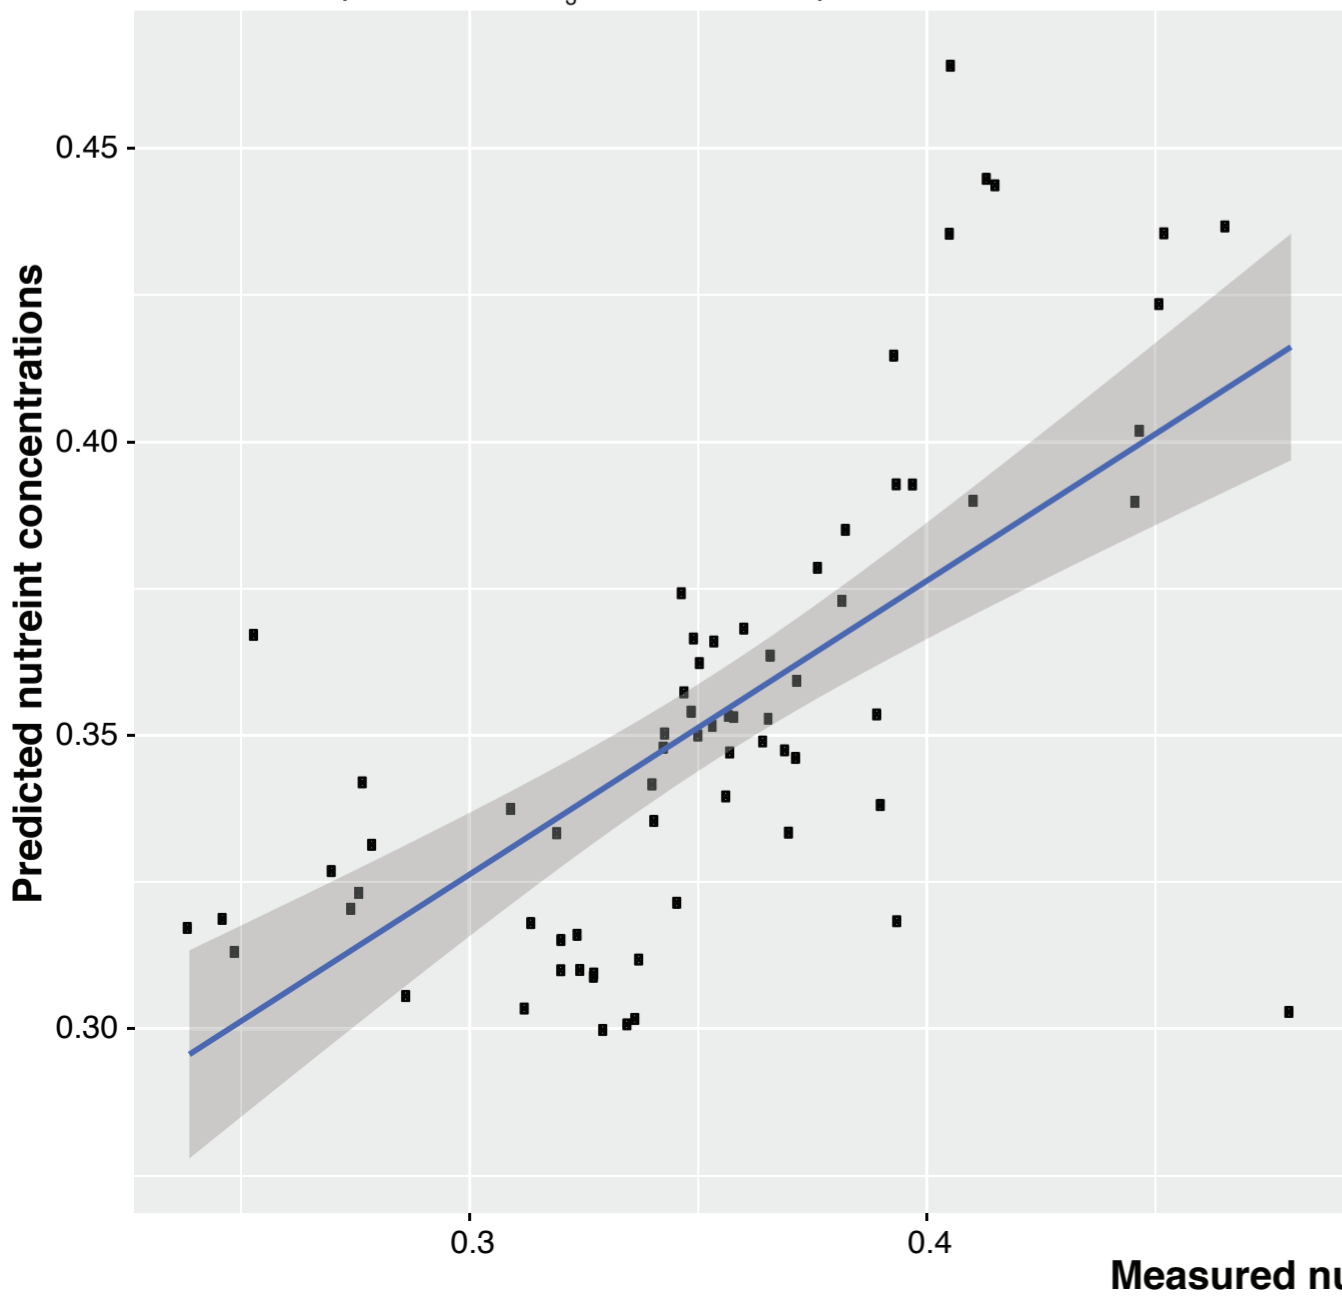**E** Comparison of PO<sub>4</sub><sup>3-</sup> measured vs predicted for module turquoise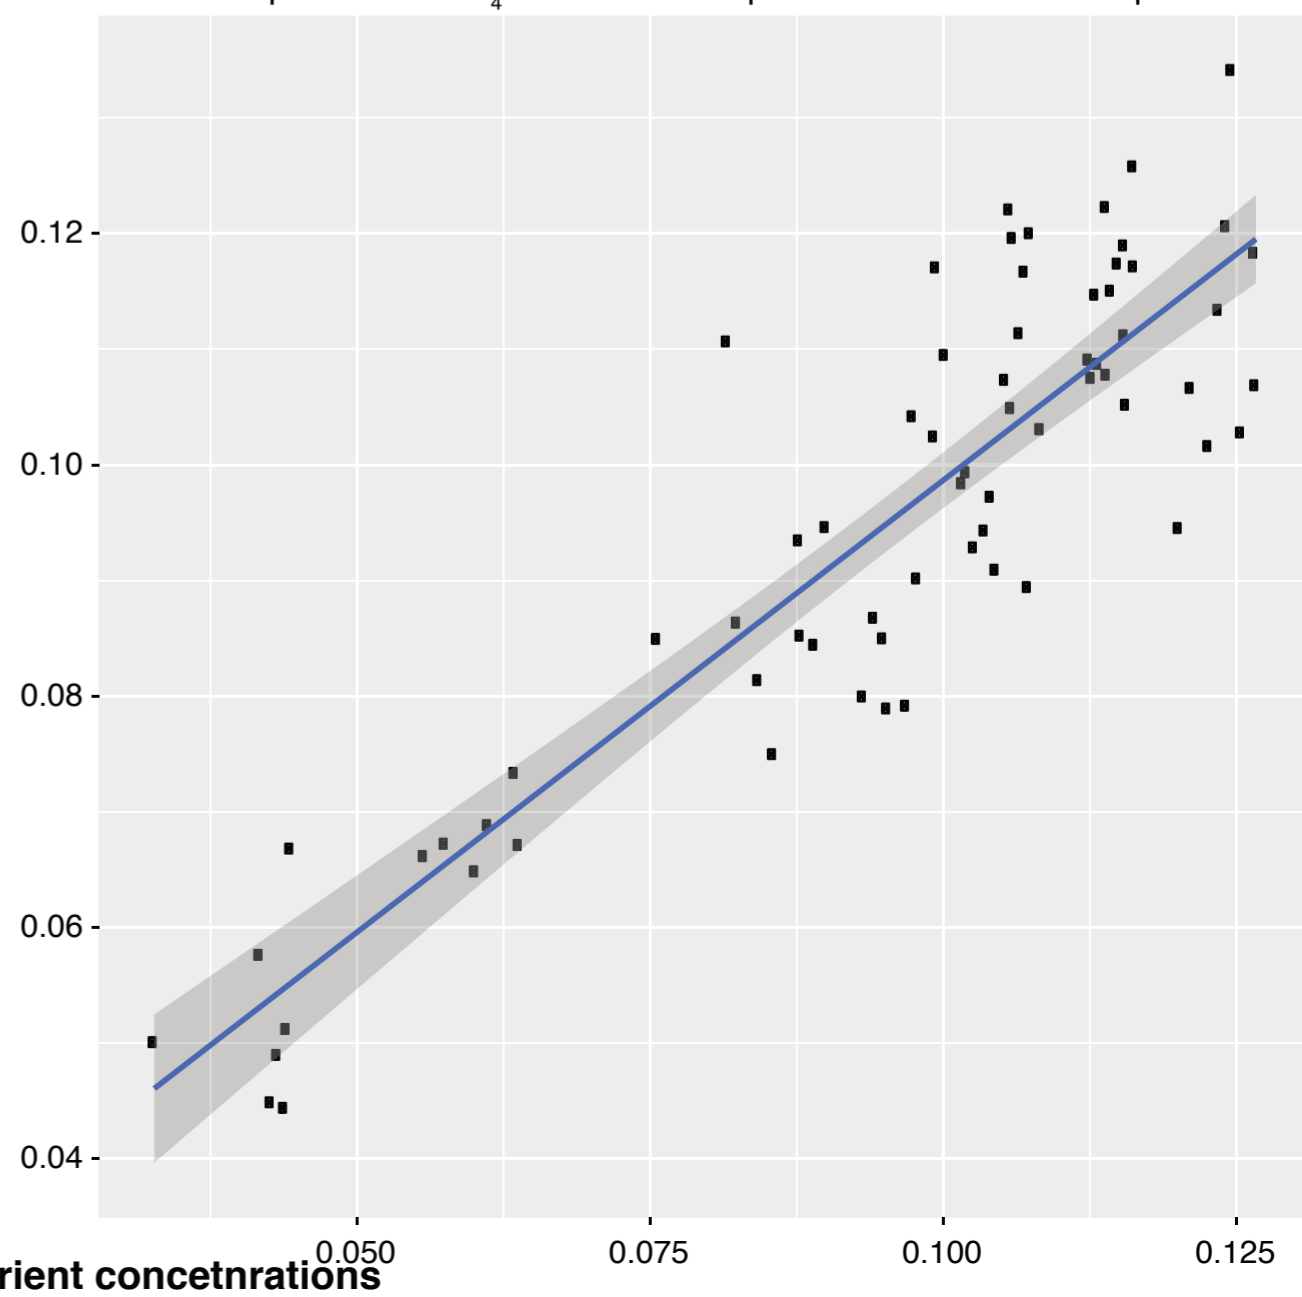

Supplement: Supplementary file [file 091512-7.pdf]
